# Supplementary material for: A rhodamine based turn-on chemosensor for Fe3+ in aqueous medium and interactions of its Fe3+ complex with HSA
Source: Royal Society of Chemistry journal article supplement (doi:10.1039/c7nj02446k), 2017-01-01
Supplement: c7nj02446k1.pdf [file c7nj02446k1.pdf]

## Rhodamine based Turn-On Chemosensor for Fe<sup>3+</sup> in Aqueous Medium and Interactions of Its Fe<sup>3+</sup> Complex with HSA.

Rahul Bhowmick<sup>a</sup>, Abu Saleh Musha Islam<sup>a</sup>, Arindam Giri<sup>a</sup>, Atul Katarkar<sup>b</sup> and Mahammad Ali,<sup>\* a</sup>

<sup>†</sup>Department of Chemistry, Jadavpur University, 188, Raja Subodh Chandra Mallick Rd, Kolkata, West Bengal 700032, India, [m.ali2062@yahoo.com](mailto:m.ali2062@yahoo.com)

<sup>‡</sup>Department of Molecular & Human Genetics Division, CSIR-Indian Institute of Chemical Biology, 4 Raja S.C. Mallick Road, Kolkata-700032, India

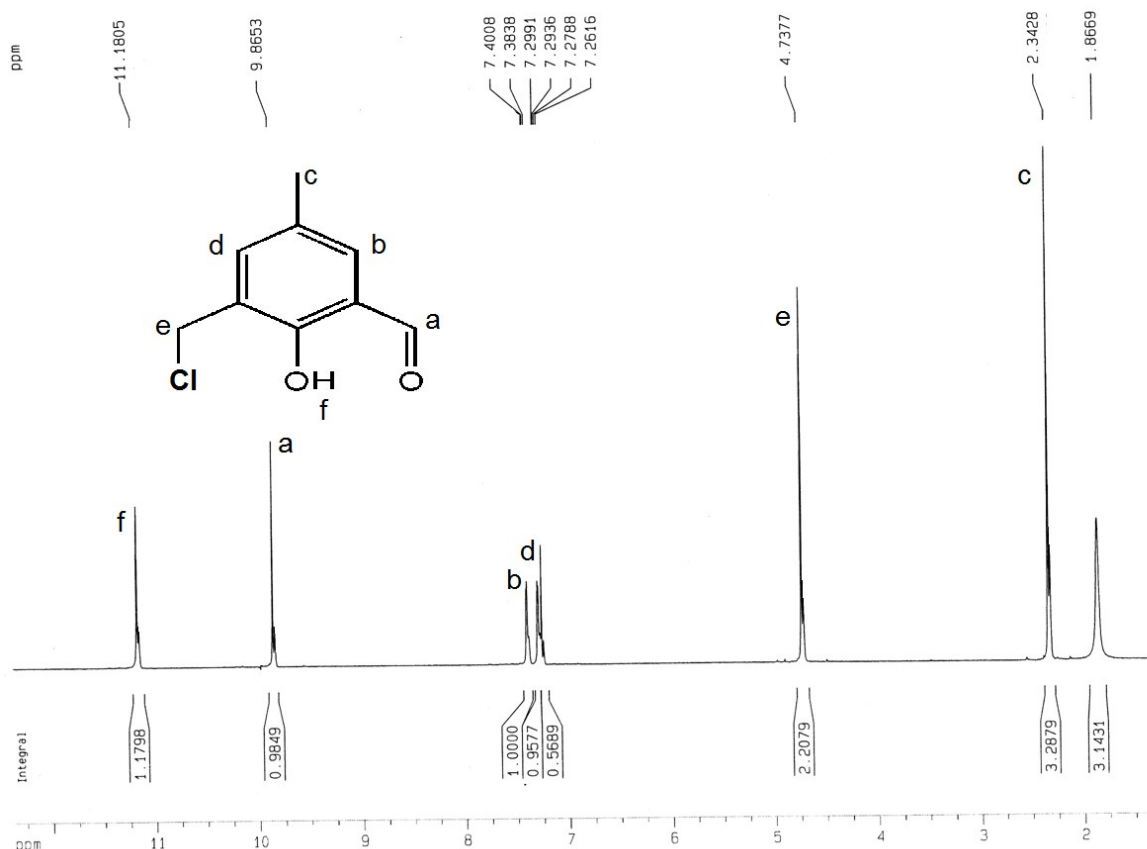

**Figure S1.** <sup>1</sup>H NMR spectrum of **1** in CDCl<sub>3</sub>, in Bruker 300 MHz instrument.

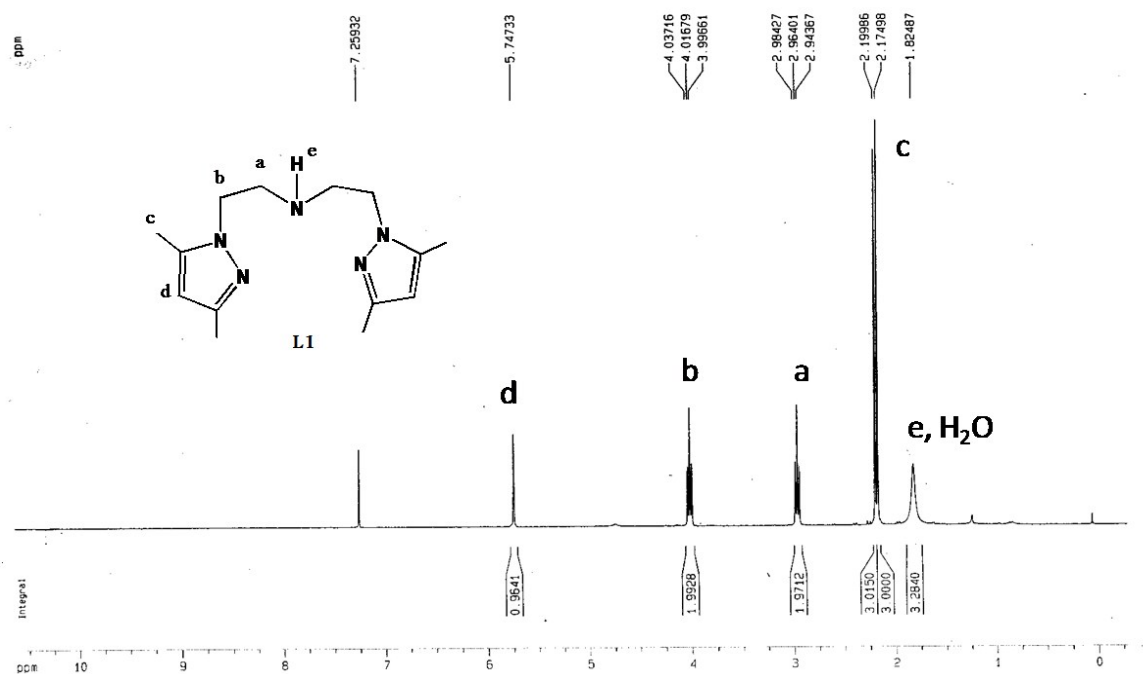

**Figure S2.**  $^1\text{H}$  NMR spectrum of **2** in  $\text{CDCl}_3$ , in Bruker 300 MHz instrument.

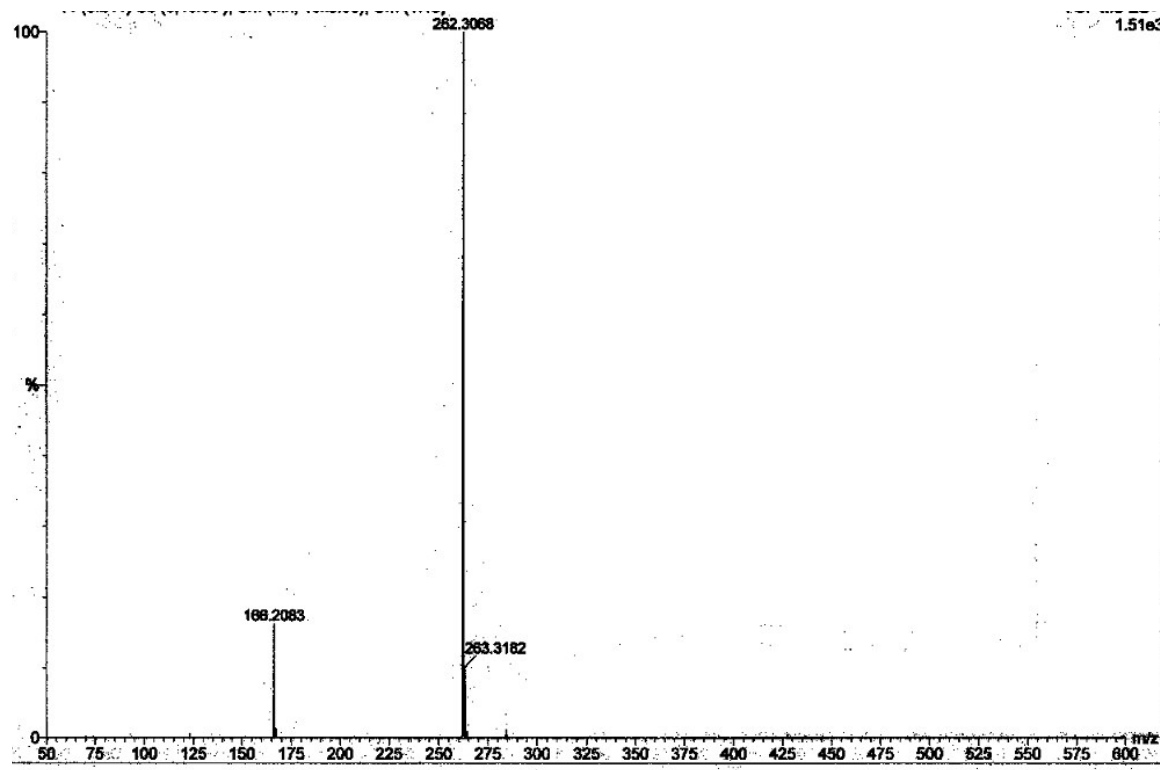

**Figure S3.** HRMS spectrum of **2** in MeCN.

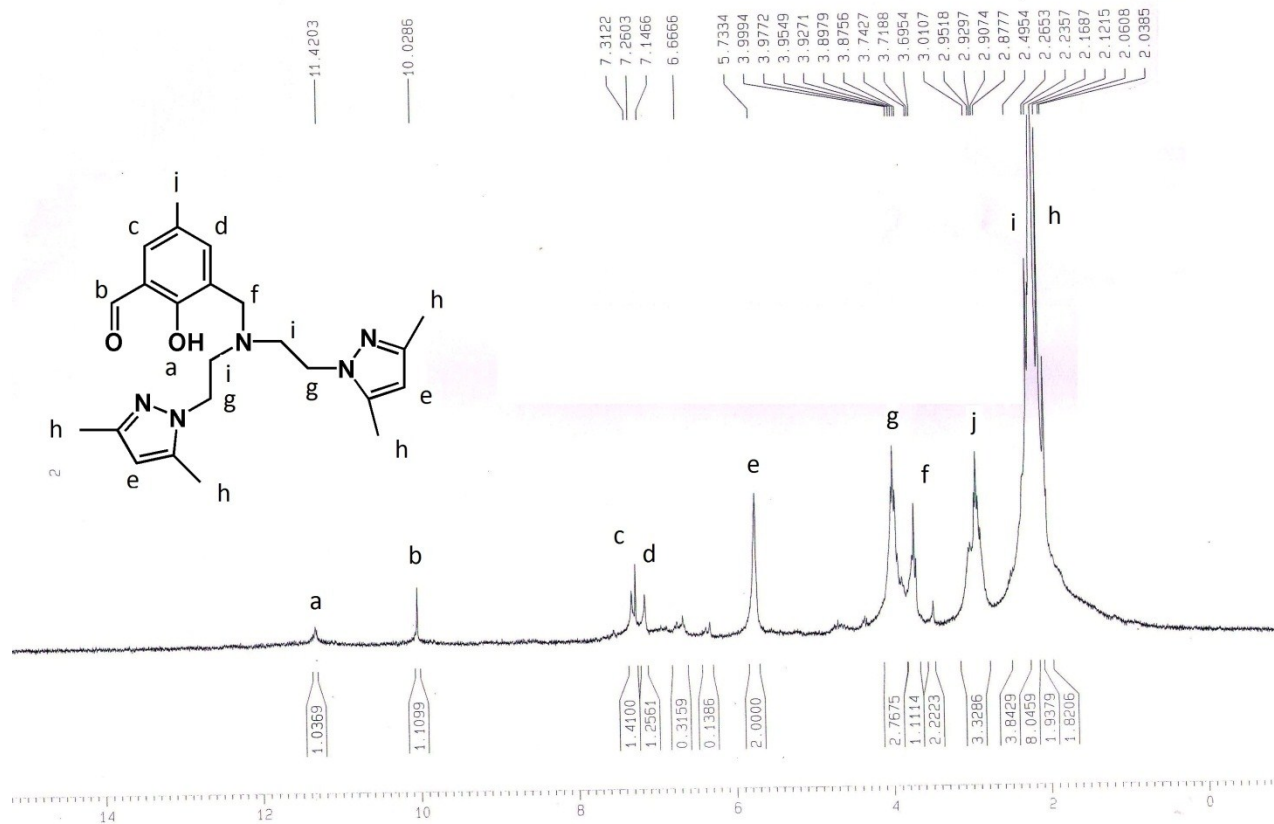

**Figure S4.**  $^1\text{H}$  NMR spectrum of **3** in  $\text{CDCl}_3$ , in Bruker 300 MHz instrument.

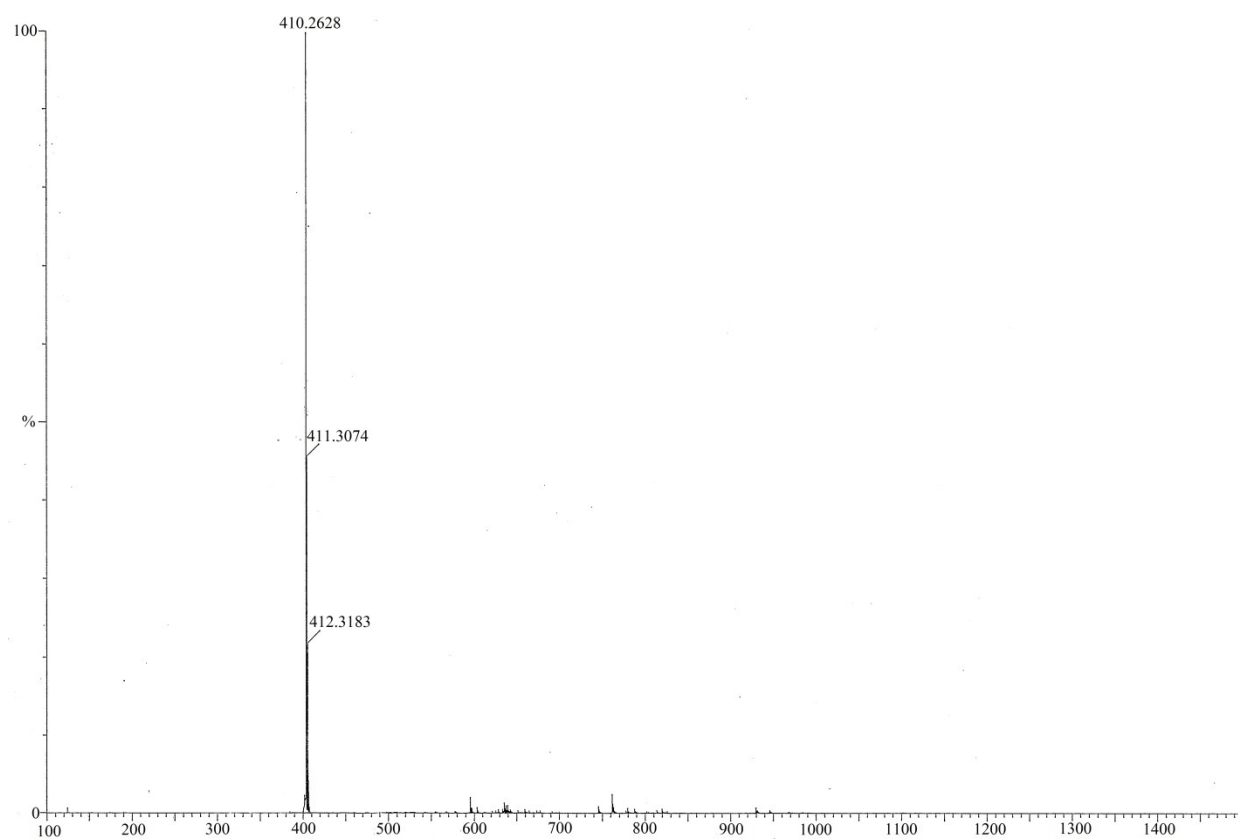

**Figure S5.** HRMS spectrum of **3** in MeCN

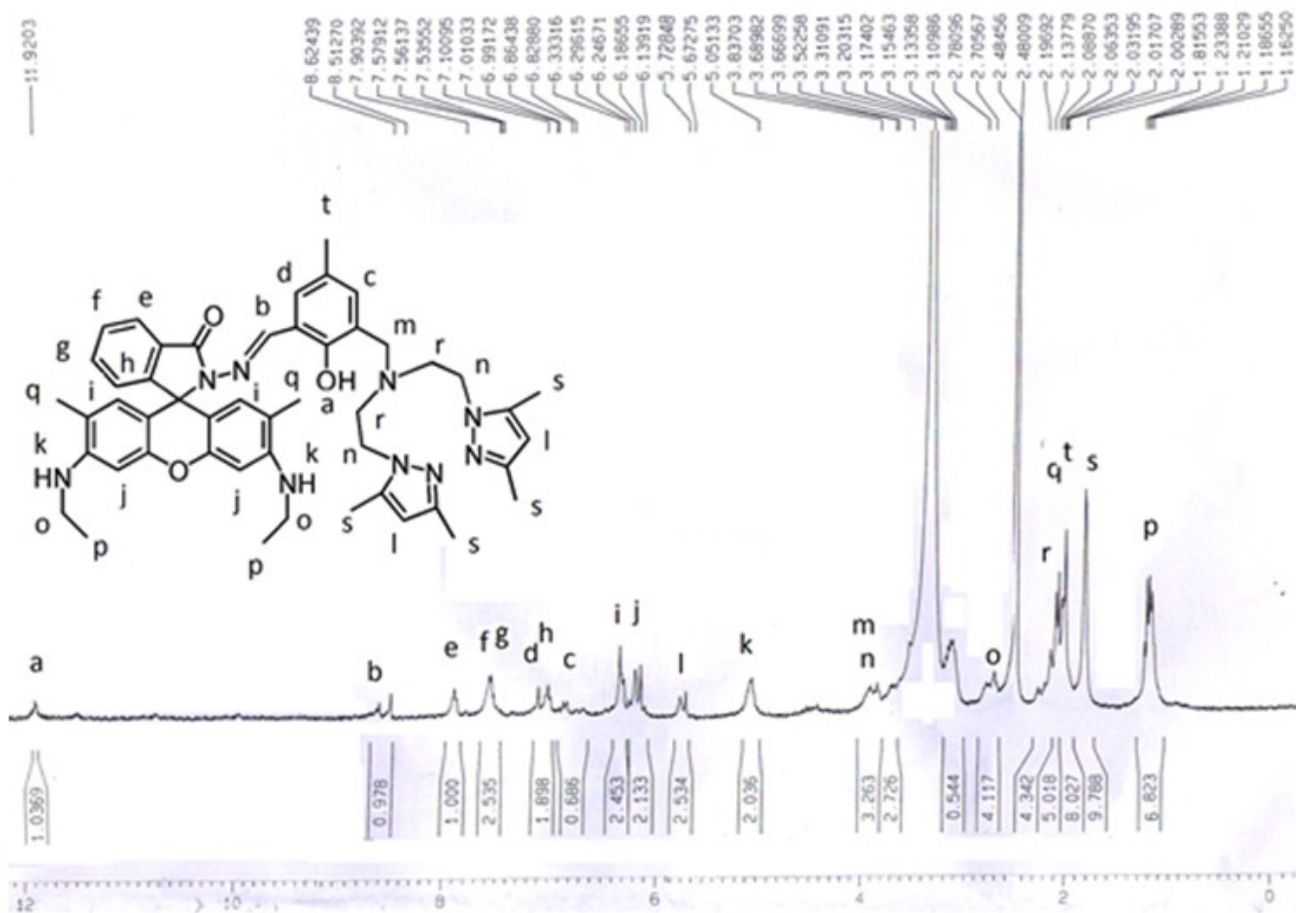

**Figure S6.**  $^1\text{H}$  NMR spectrum of **HL6** in  $\text{CDCl}_3$ , in Bruker 300 MHz instrument.

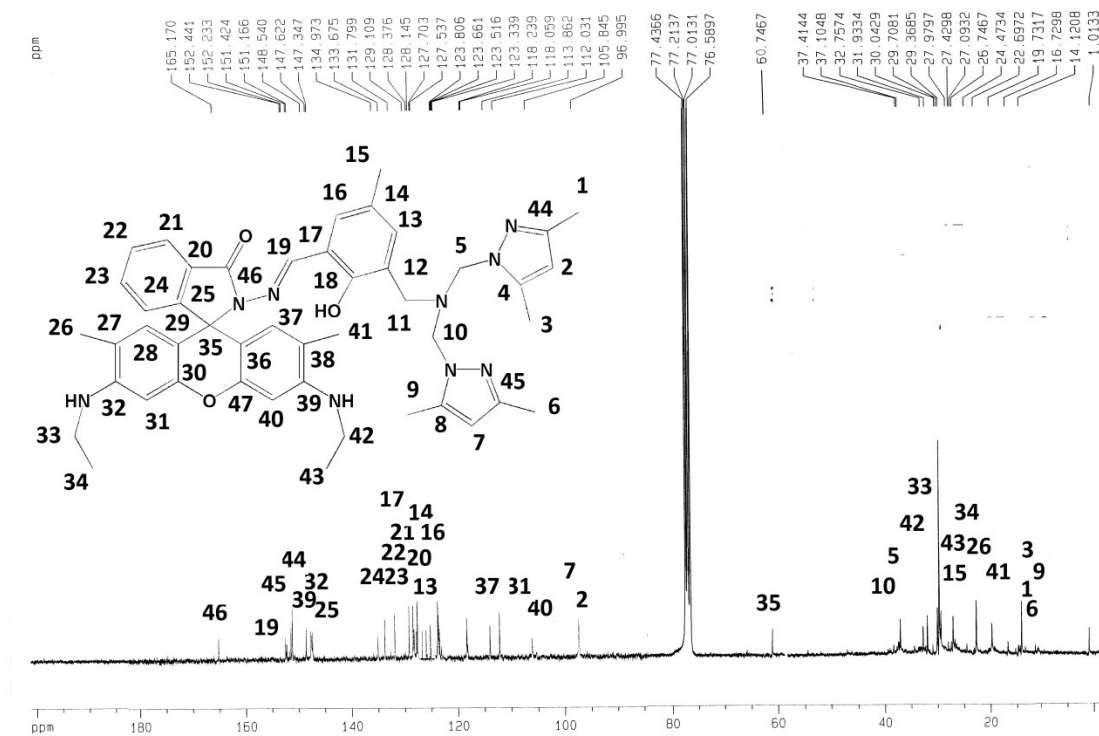

Figure S7.  $^{13}\text{C}$  NMR spectrum of  $\text{HL}^6$  in  $\text{CDCl}_3$ , in Bruker 300 MHz instrument.

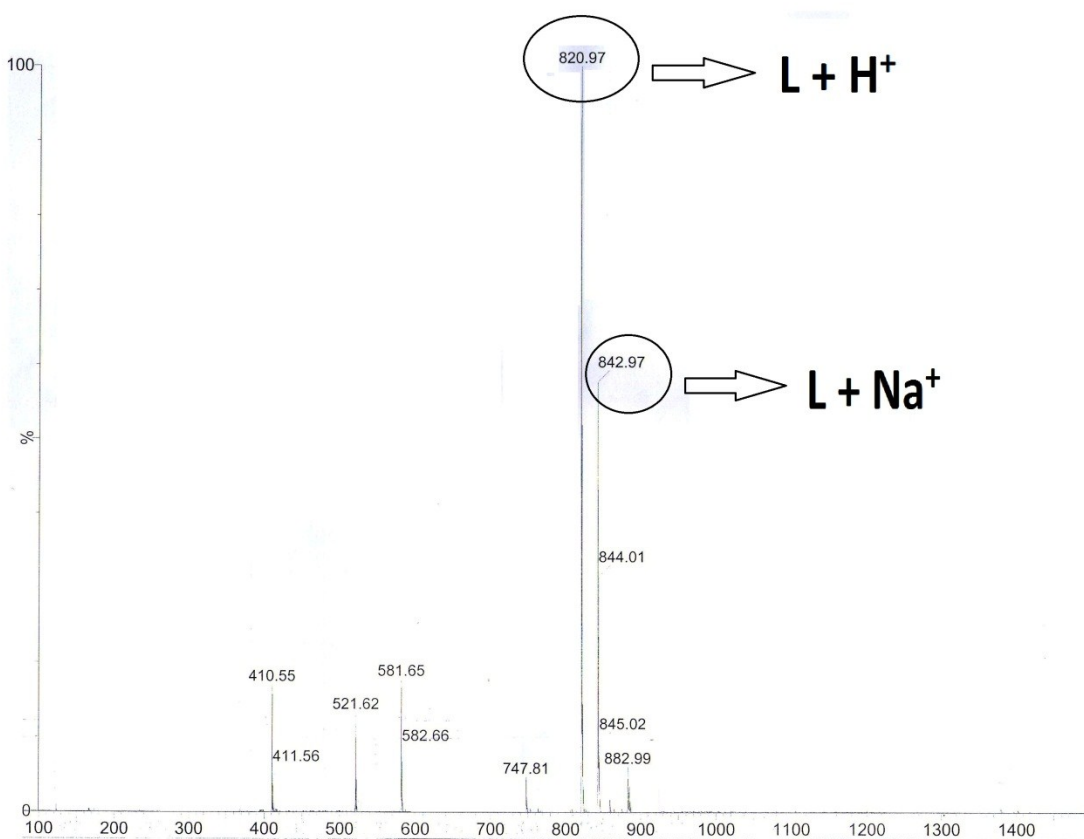

**Figure S8.** Mass spectra of  $HL^6$



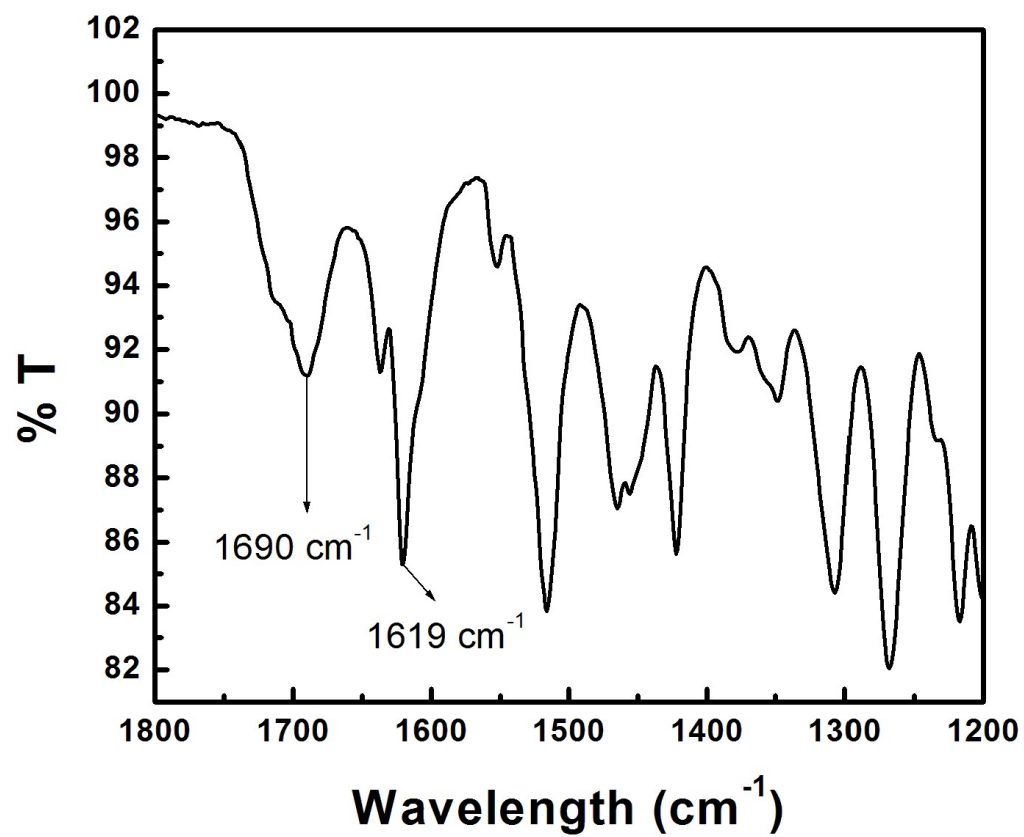

Figure S9. IR spectra of HL<sup>6</sup>.

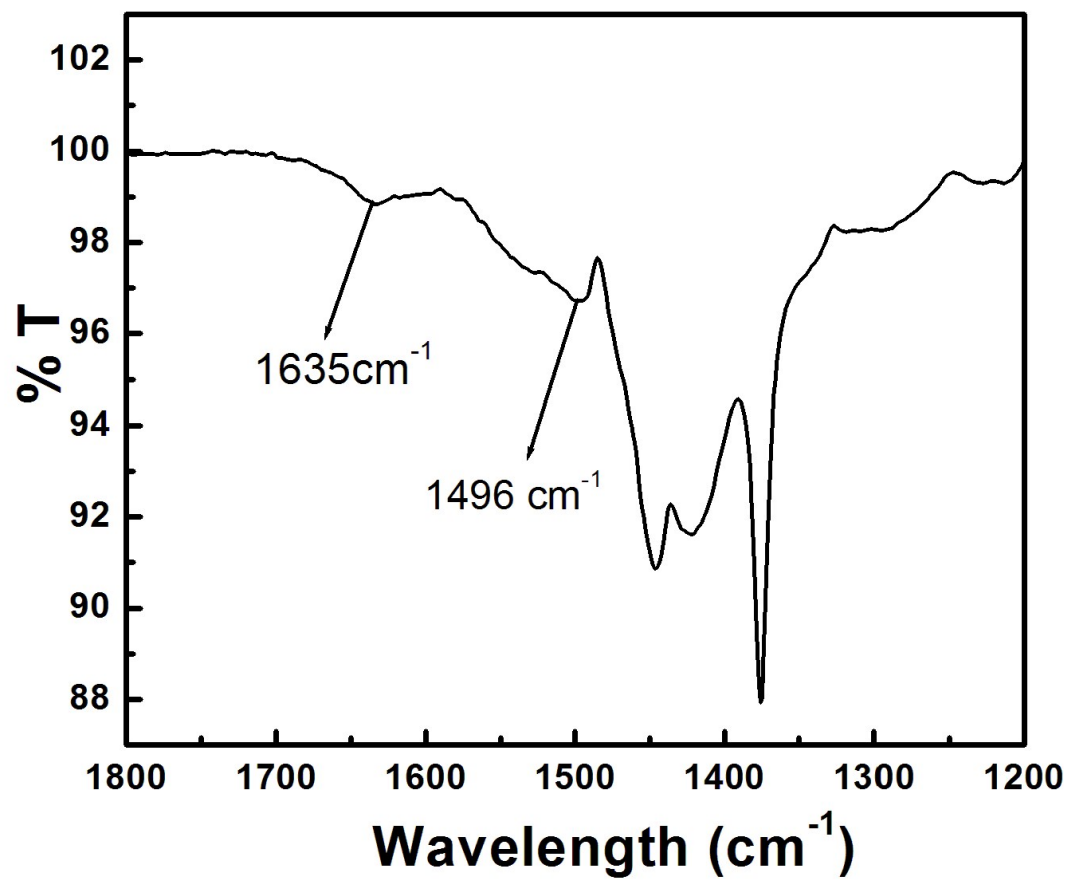

Figure S10. IR Spectrum of [L<sup>6</sup>-Fe]<sup>2+</sup> complex

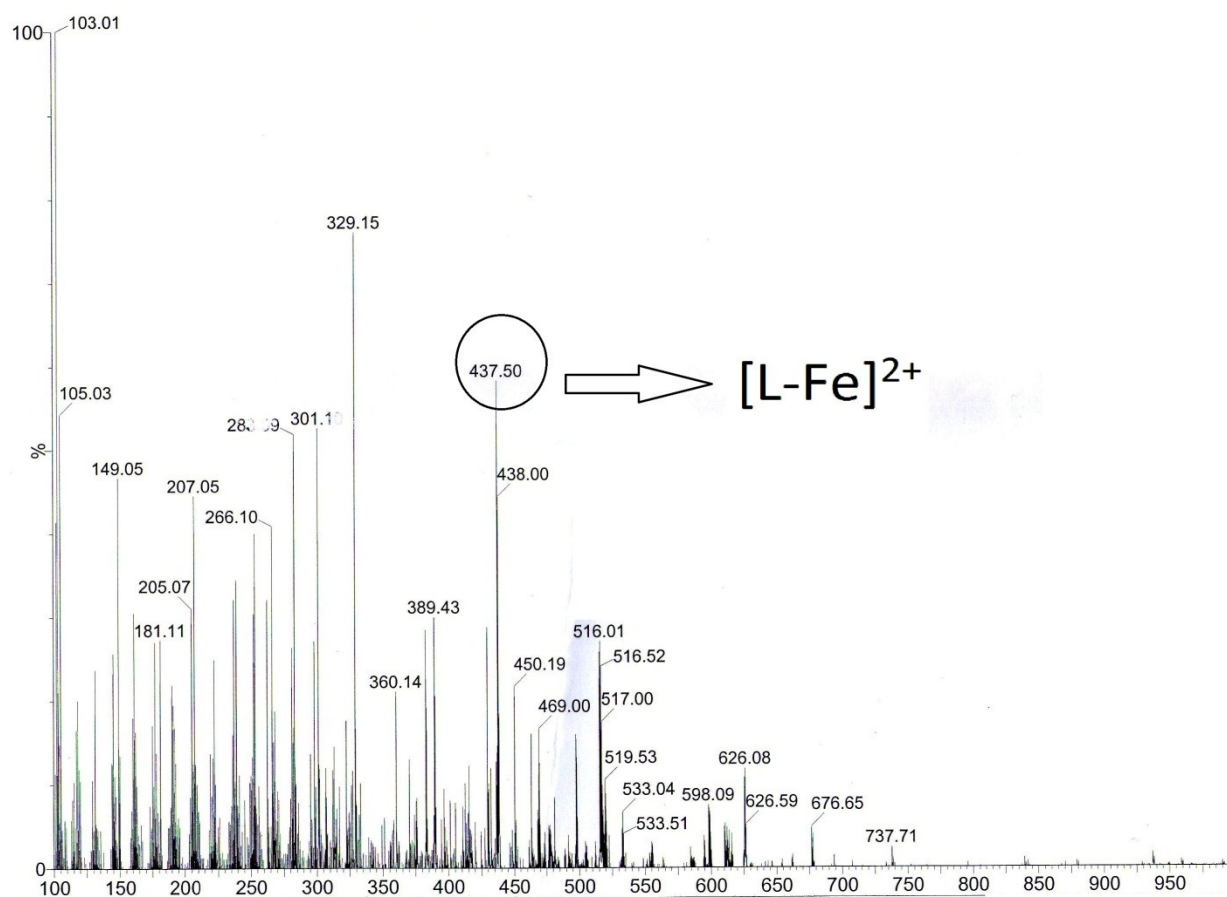

**Figure S11a.** Mass spectra of  $[L-Fe]^{2+}$  complex

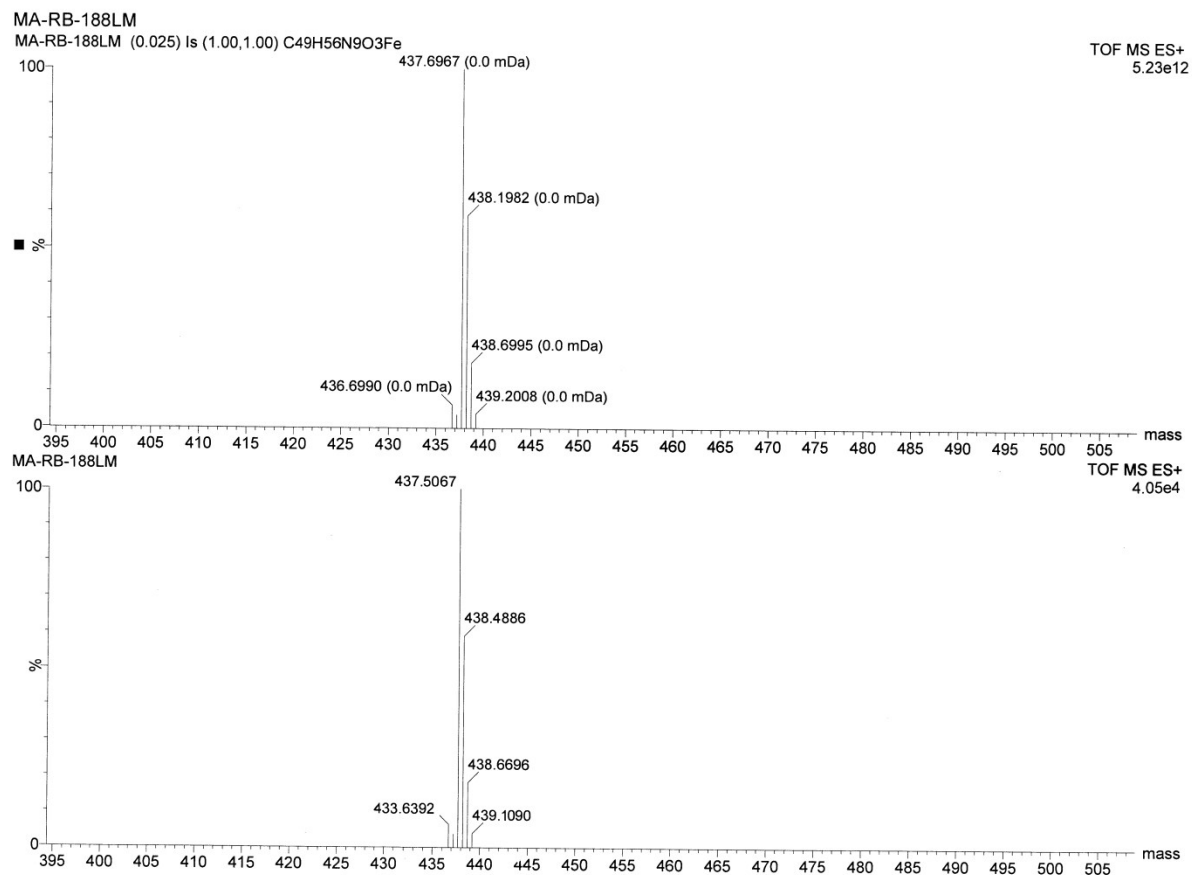

**Figure S11b.** Simulated Mass spectra of  $[L^6\text{-Fe}]^{2+}$  complex

### **Solution preparation for UV-Vis and fluorescence studies.**

10 ml  $1.0 \times 10^{-3}$  M solutions of the probe **HL<sup>6</sup>** and  $\text{Fe}(\text{NO}_3)_3 \cdot 9\text{H}_2\text{O}$  were prepared separately by dissolving appropriate amount of the materials in MeCN and used as stocks for all the UV-Vis and fluorescence studies. Similarly,  $1.0 \times 10^{-3}$  M 250  $\mu\text{L}$  HSA solution was prepared freshly in 10 mM Tris buffer prepared by dissolving appropriate amount of HEPES in 100 ml water and pH was adjusted at 7.24 using HCl and NaOH as required. For UV-Vis spectral studies a 2.5 ml aliquot of the buffer solution was pipetted out into a cuvette to which 50  $\mu\text{M}$  of the probe was added. Now, to this buffer solution  $\text{Fe}^{3+}$  was added starting from 0 to 58  $\mu\text{M}$  at a regular interval of volume. UV-Vis spectra were recorded for each of these solutions. For fluorescence studies, to 20  $\mu\text{M}$  **HL<sup>6</sup>** was used instead of 50  $\mu\text{M}$  as in UV-Vis studies keeping other conditions the same and  $\text{Fe}^{3+}$  was added starting from 0 to 41  $\mu\text{M}$  at a regular incremental volume and fluorescence studies were performed for each solution. Again, for protein binding studies, to 10  $\mu\text{M}$  [**L<sup>6</sup>**- $\text{Fe}$ ]<sup>2+</sup> complex solution (prepared by mixing equimolar concentration of **HL<sup>6</sup>** and  $\text{Fe}^{3+}$ ) HSA solution was varied between 0 and 10  $\mu\text{M}$ . For both emission and absorption studies 1 cm path length of the cuvette was used. 2 nm x 2 nm slit widths were used for all fluorescence studies.

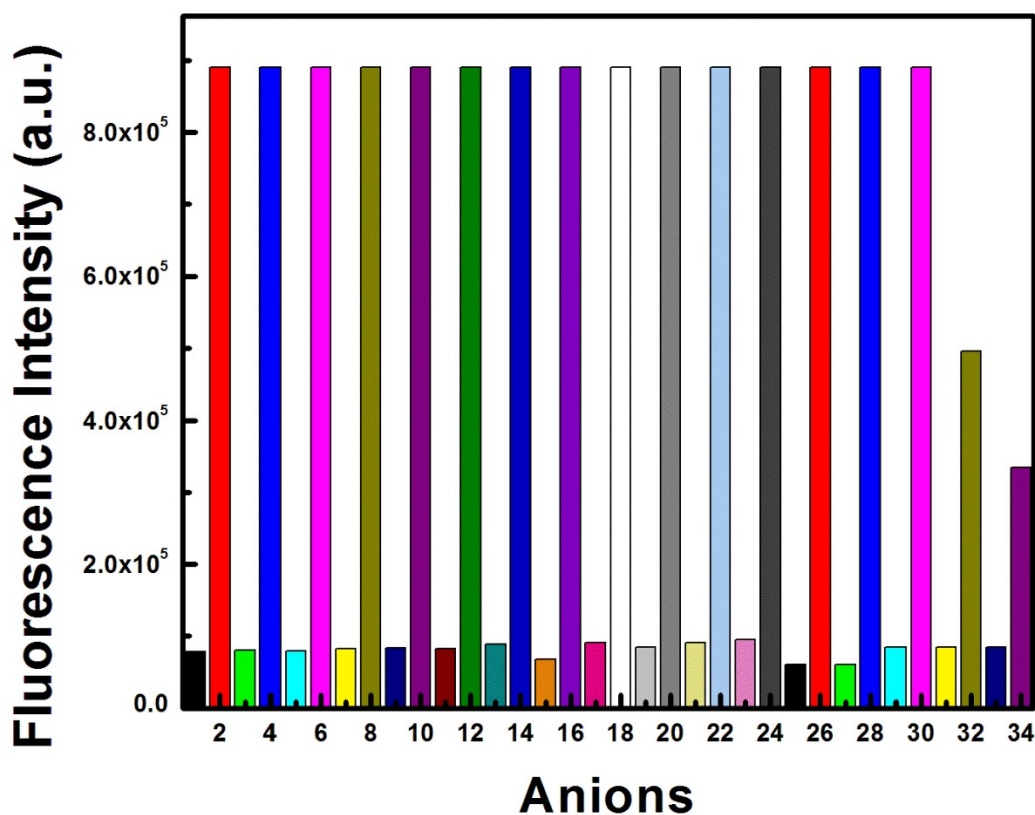

**Figure S12a.** Fluorescence emission of HL<sup>6</sup> (50  $\mu$ M) induced by different anions (250  $\mu$ M). ( 1-34 are HL<sup>6</sup>, HL<sup>6</sup>+Fe<sup>3+</sup>, HL<sup>6</sup>+ CN<sup>-</sup>, HL<sup>6</sup>+ CN<sup>-</sup>+Fe<sup>3+</sup>, HL<sup>6</sup>+ SO<sub>4</sub><sup>2-</sup>, HL<sup>6</sup>+ SO<sub>4</sub><sup>2-</sup>+Fe<sup>3+</sup>, HL<sup>6</sup>+ NO<sub>3</sub><sup>-</sup>, HL<sup>6</sup>+ NO<sub>3</sub><sup>-</sup>+Fe<sup>3+</sup>, HL<sup>6</sup>+ PO<sub>4</sub><sup>3-</sup>, HL<sup>6</sup>+ PO<sub>4</sub><sup>3-</sup>+Fe<sup>3+</sup>, HL<sup>6</sup>+ S<sup>2-</sup>, HL<sup>6</sup>+ S<sup>2-</sup>+Fe<sup>3+</sup>, HL<sup>6</sup>+ Cl<sup>-</sup>, HL<sup>6</sup>+ Cl<sup>-</sup>+Fe<sup>3+</sup>, HL<sup>6</sup>+ Br<sup>-</sup>, HL<sup>6</sup>+ Br<sup>-</sup>+Fe<sup>3+</sup>, HL<sup>6</sup>+ OAc<sup>-</sup>, HL<sup>6</sup>+ OAc<sup>-</sup>+Fe<sup>3+</sup>, HL<sup>6</sup>+ H<sub>2</sub>AsO<sub>4</sub><sup>-</sup>, HL<sup>6</sup>+ H<sub>2</sub>AsO<sub>4</sub><sup>-</sup>+Fe<sup>3+</sup>, HL<sup>6</sup>+ ClO<sub>4</sub><sup>-</sup>, HL<sup>6</sup>+ ClO<sub>4</sub><sup>-</sup>+Fe<sup>3+</sup>, HL<sup>6</sup>+ S<sub>2</sub>O<sub>4</sub><sup>2-</sup>, HL<sup>6</sup>+ S<sub>2</sub>O<sub>4</sub><sup>2-</sup>+Fe<sup>3+</sup>, HL<sup>6</sup>+ HCO<sub>3</sub><sup>-</sup>, HL<sup>6</sup>+ HCO<sub>3</sub><sup>-</sup>+Fe<sup>3+</sup>, HL<sup>6</sup>+ SCN<sup>-</sup>, HL<sup>6</sup>+ SCN<sup>-</sup>+Fe<sup>3+</sup>, HL<sup>6</sup>+ P<sub>2</sub>O<sub>7</sub><sup>4-</sup>, HL<sup>6</sup>+ P<sub>2</sub>O<sub>7</sub><sup>4-</sup>+Fe<sup>3+</sup>, HL<sup>6</sup>+ F<sup>-</sup>, HL<sup>6</sup>+ F<sup>-</sup>+Fe<sup>3+</sup>, HL<sup>6</sup>+ I<sup>-</sup>, HL<sup>6</sup>+ I<sup>-</sup>+Fe<sup>3+</sup>). Here ferric nitrate used.

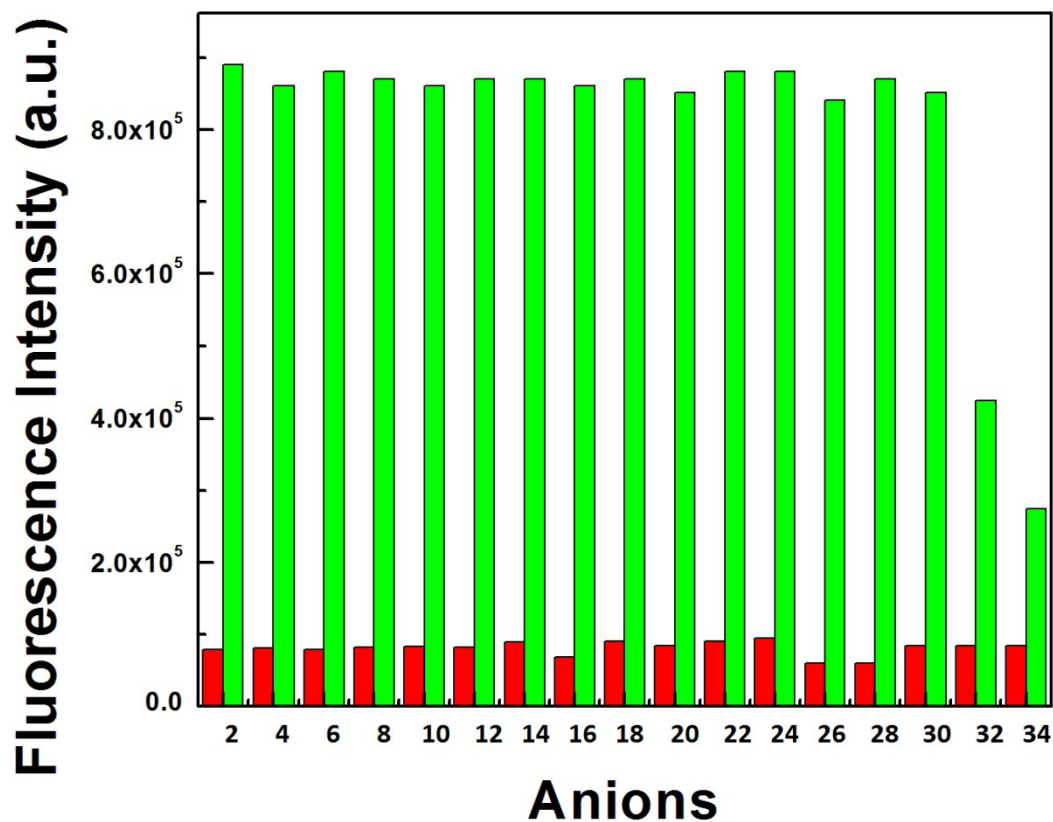

**Figure S12b.** Fluorescence emission of HL<sup>6</sup> (50  $\mu$ M) induced by different anions (250  $\mu$ M). ( 1-34 are HL<sup>6</sup>, HL<sup>6</sup>+Fe<sup>3+</sup>, HL<sup>6</sup>+ CN<sup>-</sup>, HL<sup>6</sup>+ CN<sup>-</sup>+Fe<sup>3+</sup>, HL<sup>6</sup>+ SO<sub>4</sub><sup>2-</sup>, HL<sup>6</sup>+ SO<sub>4</sub><sup>2-</sup>+Fe<sup>3+</sup>, HL<sup>6</sup>+ NO<sub>3</sub><sup>-</sup>, HL<sup>6</sup>+ NO<sub>3</sub><sup>-</sup>+Fe<sup>3+</sup>, HL<sup>6</sup>+ PO<sub>4</sub><sup>3-</sup>, HL<sup>6</sup>+ PO<sub>4</sub><sup>3-</sup>+Fe<sup>3+</sup>, HL<sup>6</sup>+ S<sup>2-</sup>, HL<sup>6</sup>+ S<sup>2-</sup>+Fe<sup>3+</sup>, HL<sup>6</sup>+ Cl<sup>-</sup>, HL<sup>6</sup>+ Cl<sup>-</sup>+Fe<sup>3+</sup>, HL<sup>6</sup>+ Br<sup>-</sup>, HL<sup>6</sup>+ Br<sup>-</sup>+Fe<sup>3+</sup>, HL<sup>6</sup>+ OAc<sup>-</sup>, HL<sup>6</sup>+ OAc<sup>-</sup>+Fe<sup>3+</sup>, HL<sup>6</sup>+ H<sub>2</sub>AsO<sub>4</sub><sup>-</sup>, HL<sup>6</sup>+ H<sub>2</sub>AsO<sub>4</sub><sup>-</sup>+Fe<sup>3+</sup>, HL<sup>6</sup>+ ClO<sub>4</sub><sup>-</sup>, HL<sup>6</sup>+ ClO<sub>4</sub><sup>-</sup>+Fe<sup>3+</sup>, HL<sup>6</sup>+ S<sub>2</sub>O<sub>4</sub><sup>2-</sup>, HL<sup>6</sup>+ S<sub>2</sub>O<sub>4</sub><sup>2-</sup>+Fe<sup>3+</sup>, HL<sup>6</sup>+ HCO<sub>3</sub><sup>-</sup>, HL<sup>6</sup>+ HCO<sub>3</sub><sup>-</sup>+Fe<sup>3+</sup>, HL<sup>6</sup>+ SCN<sup>-</sup>, HL<sup>6</sup>+ SCN<sup>-</sup>+Fe<sup>3+</sup>, HL<sup>6</sup>+ P<sub>2</sub>O<sub>7</sub><sup>4-</sup>, HL<sup>6</sup>+ P<sub>2</sub>O<sub>7</sub><sup>4-</sup>+Fe<sup>3+</sup>, HL<sup>6</sup>+ F<sup>-</sup>, HL<sup>6</sup>+ F<sup>-</sup>+Fe<sup>3+</sup>, HL<sup>6</sup>+ I<sup>-</sup>, HL<sup>6</sup>+ I<sup>-</sup>+Fe<sup>3+</sup>). Here ferric perchlorate used.

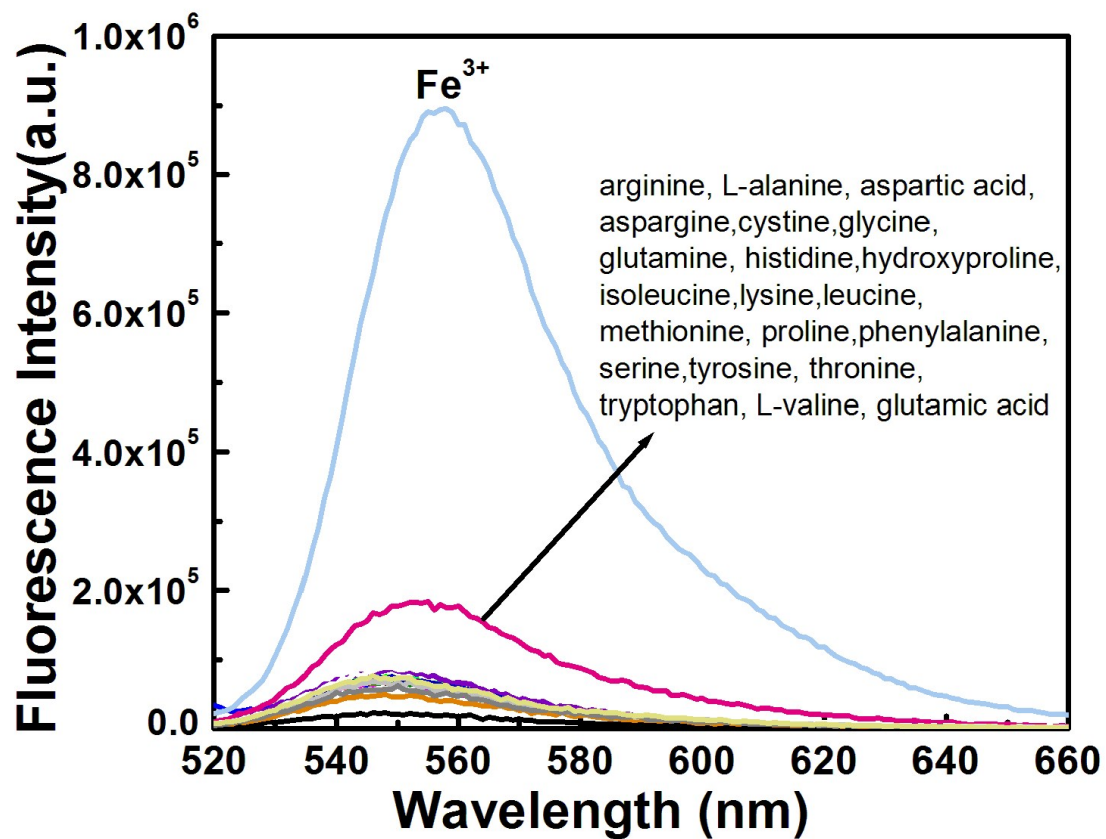

Figure S13. Fluorescence emission induced by different amino acids.



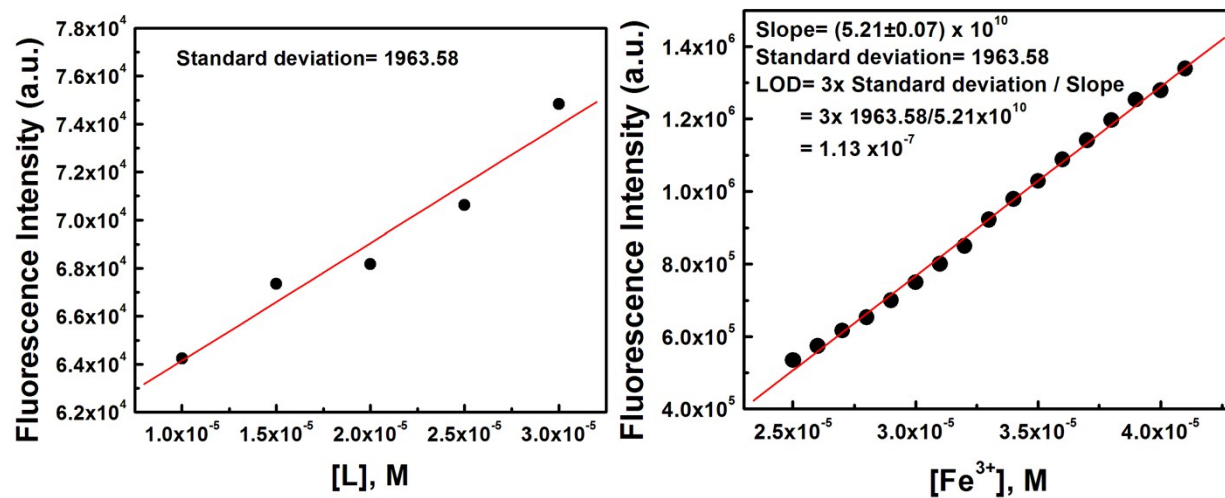

**Figure S14.** Determination of Limit of detection (LOD) of  $Fe^{3+}$  by L from the slope of the plot of FI vs.  $[Fe^{3+}]$  and the standard deviation of the blank (intercept) determined from the plot of FI vs.  $[L]$  utilizing  $3\sigma$  method.

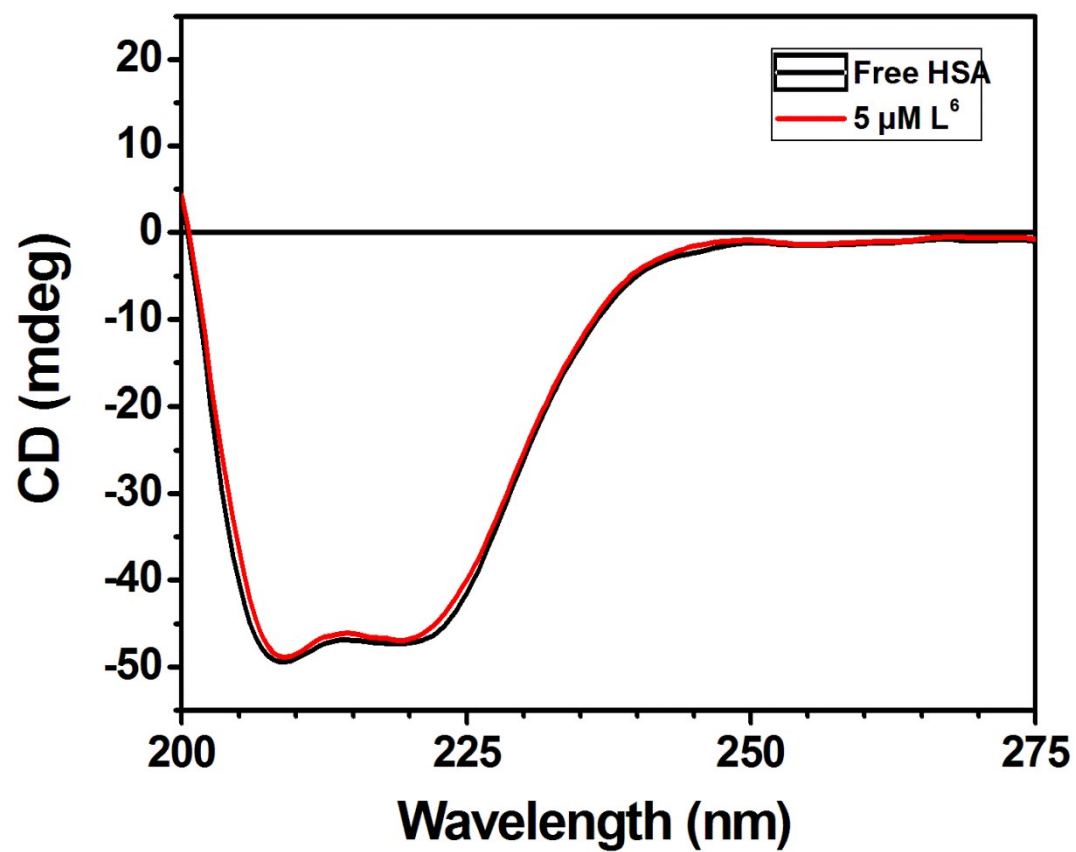

**Figure S15.** Effect of L<sup>6</sup> on intrinsic circular dichroic (CD) spectrum of HAS; CD spectrum of 1.0  $\mu\text{M}$  HSA treated with 5.0  $\mu\text{M}$  L<sup>6</sup>, at 25 °C.

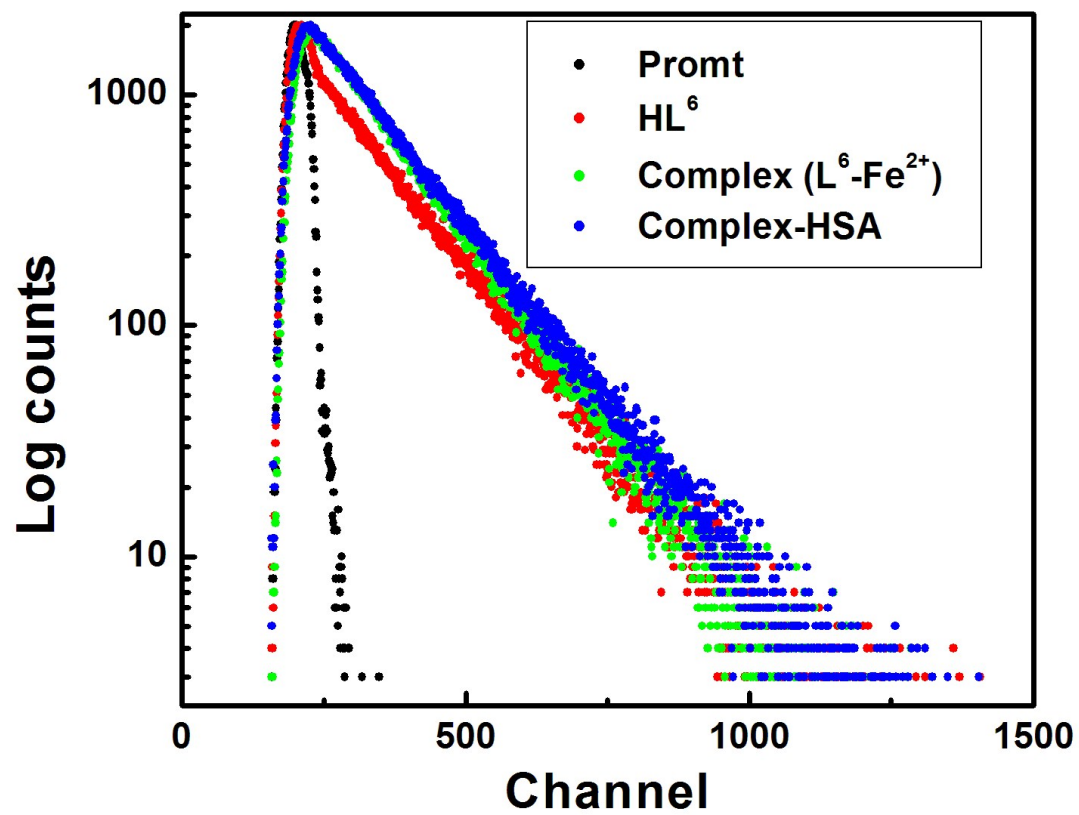

**Figure S16.** Fluorescence decay curves of HL<sup>6</sup>, [L<sup>6</sup>-Fe]<sup>2+</sup> and [L<sup>6</sup>-Fe]<sup>2+</sup> in presence of HSA.

**Table S1.** Life time of  $[L^6\text{-Fe}]^{2+}$  complex in different protein concentration monitored 450 nm plate.

| [HSA], $\mu\text{M}$ | Life time(ns) |
|----------------------|---------------|
| 0                    | 3.26          |
| 2                    | 3.50          |
| 4                    | 3.51          |
| 6                    | 3.52          |
| 8                    | 3.53          |
| 10                   | 3.59          |

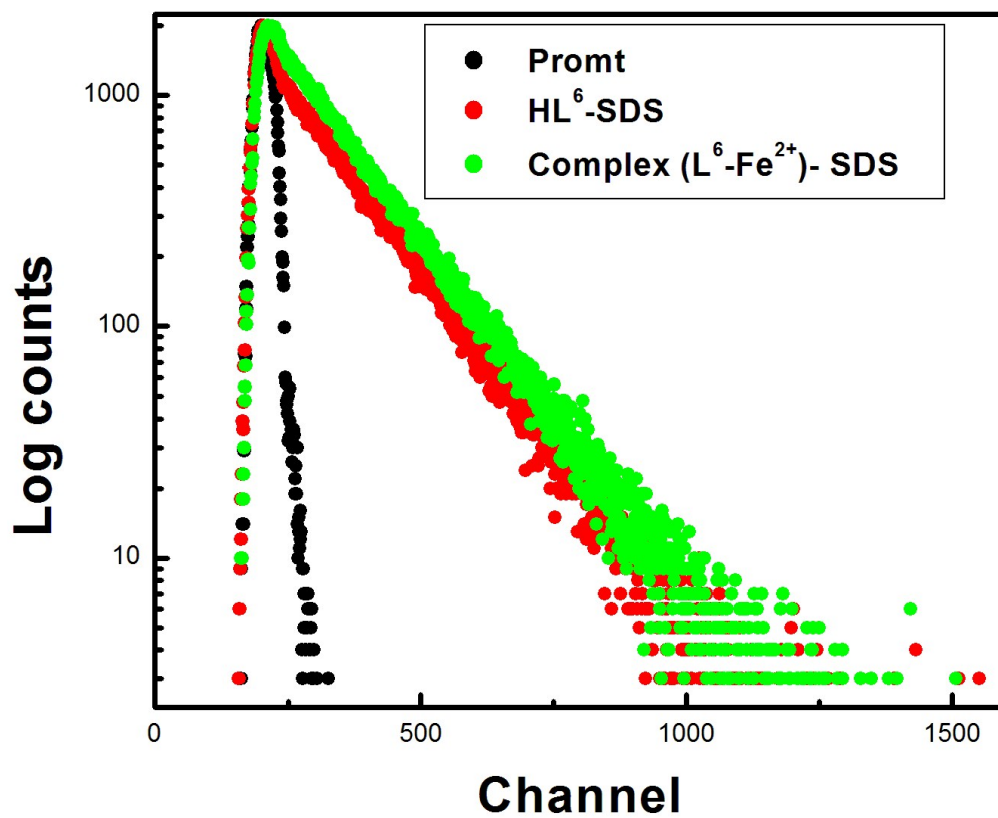

**Figure S17.** Fluorescence decay curves of HL<sup>6</sup> and [L<sup>6</sup>-Fe]<sup>2+</sup> in presence of SDS.

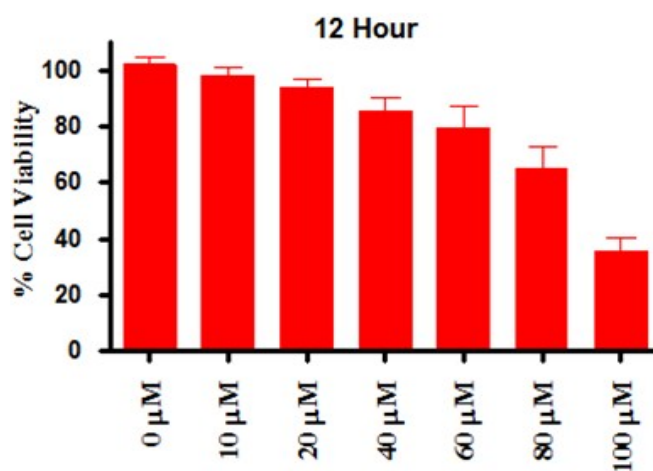

**Figure S18.** Cell viability assay performed by using ligand HL<sup>6</sup>.

Table S2. Comparison of results of the probe HL<sup>6</sup> with other reported Fe<sup>3+</sup> sensors.

| Ligand                                                                              | Solvent(s)                                | Limit of Detection | Ref |
|-------------------------------------------------------------------------------------|-------------------------------------------|--------------------|-----|
| 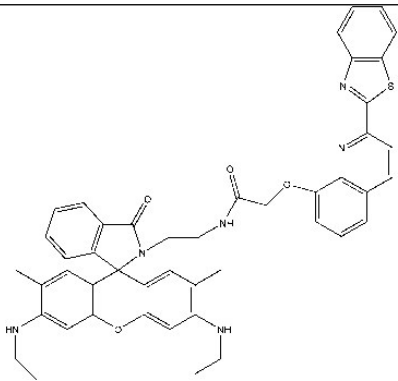  | CH <sub>3</sub> OH/H <sub>2</sub> O (2/3) | 0.01 μM            | 38  |
|  | THF/H <sub>2</sub> O (99:1)               | 4.8 μM             | 39  |

|                                                                                     |                                      |        |    |
|-------------------------------------------------------------------------------------|--------------------------------------|--------|----|
| 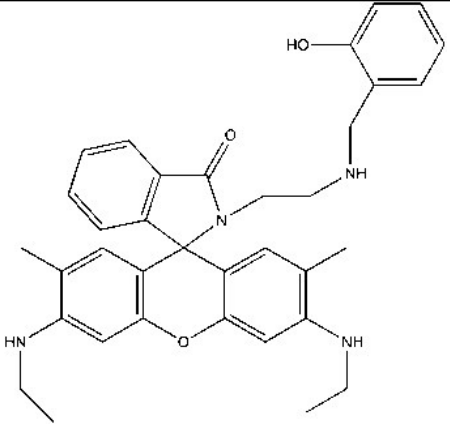   | EtOH                                 | -      | 40 |
|    | 10% Aqueous ethanol                  | -      | 41 |
|  | Tris-HCl:<br>CH <sub>3</sub> CN(1:1) | 0.05μM | 42 |

|                                                                                    |                                           |        |    |
|------------------------------------------------------------------------------------|-------------------------------------------|--------|----|
| 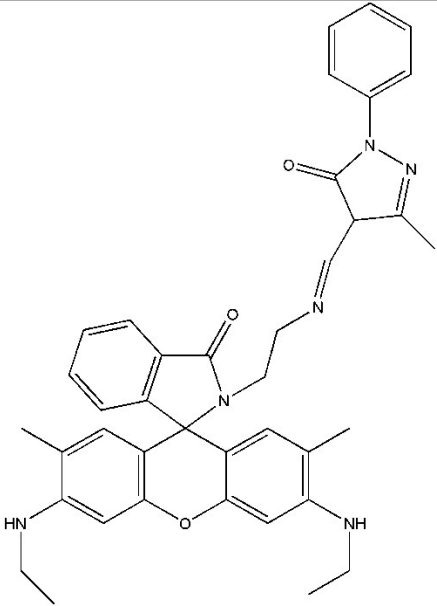  | H <sub>2</sub> O: CH <sub>3</sub> CN(1:1) | 6.1μM  | 43 |
|  | Ethanol                                   | 5.6ppb | 44 |



|                                                                                     |                                                        |         |    |
|-------------------------------------------------------------------------------------|--------------------------------------------------------|---------|----|
| 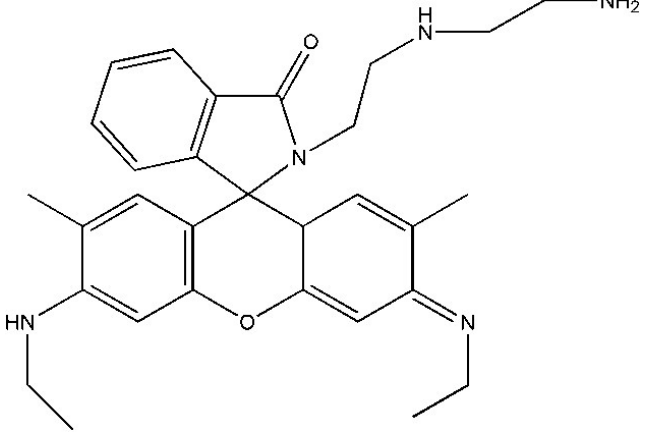   | DMF/H <sub>2</sub> O                                   | -       | 45 |
|   | H <sub>2</sub> O: CH <sub>3</sub> CN(1:1)              | 0.09 μM | 46 |
|  | Hydrogel<br>formation insoluble<br>in H <sub>2</sub> O | -       | 47 |

|                                                                                                                                                                                                                                                                                                                                                                                                                                                                                    |         |        |    |
|------------------------------------------------------------------------------------------------------------------------------------------------------------------------------------------------------------------------------------------------------------------------------------------------------------------------------------------------------------------------------------------------------------------------------------------------------------------------------------|---------|--------|----|
| 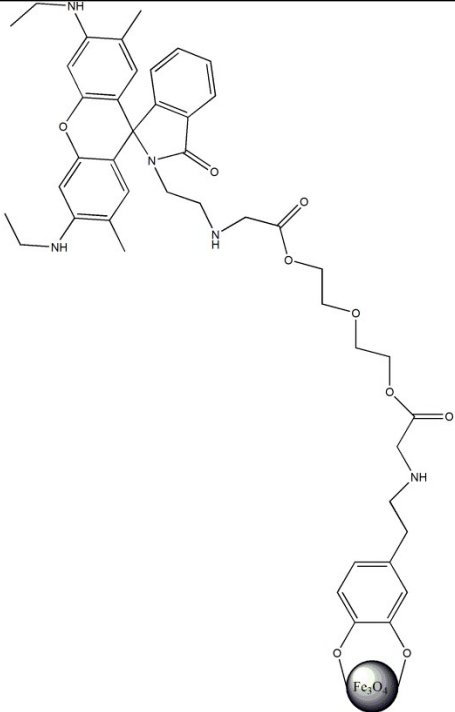 <p>The chemical structure shows a ferrocene moiety (two cyclopentadienyl rings sandwiching an iron atom, labeled Fe<sub>3</sub>O<sub>4</sub>) at the bottom. It is connected via a long, flexible linker consisting of an amide bond, an ether linkage, and several methylene groups. The linker terminates in a complex polycyclic aromatic system with multiple amine and carbonyl groups.</p> | Aqueous | 2ppb   | 48 |
|  <p>The chemical structure features a coumarin moiety (a benzene ring fused to a pyrone ring) at the top. It is connected via a linker containing an imine group and a carbonyl group to a central polycyclic aromatic system. This central system has two amine groups and a carbonyl group, and is connected to two additional aromatic rings.</p>                                             | Aqueous | 0.72μM | 49 |

|                                                                                    |         |              |           |
|------------------------------------------------------------------------------------|---------|--------------|-----------|
| 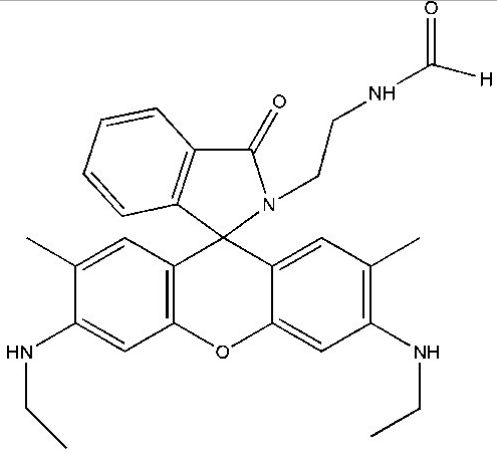  | Aqueous | 0.01 $\mu$ M | 50        |
|  | Aqueous | 0.11 $\mu$ M | This work |
